# Supplementary material for: Outcomes of an individual counselling programme in Grozny, Chechnya: a randomised controlled study
Source: PubMed Central journal article supplement — BMJ Open. 2018 Aug 23;8(8):e019794. doi: 10.1136/bmjopen-2017-019794 (PMC6112398; doi:10.1136/bmjopen-2017-019794), 2018-08-23
Supplement: bmjopen-2017-019794supp001.pdf [file bmjopen-2017-019794supp001.pdf]

### Gain Score Linear Regression baseline/T0 and T1

$$(Y_{it} - Y_{it-1}) = \beta_0 + B_{i1}Group + B_{i2}Hospital + B_{i3}Age + B_{i4}Sex + B_{i5}Education + B_{i5}Marital + B_{i6}Employment$$

Where:

$Y_{it}$  = score of subject  $i$  at time  $t$

$\beta_0$  = intercept

$\beta_{ij}$  = standardized regression coefficient of independent variable  $j$  for subject  $i$

### Gain Score Linear Regression Follow-up

$$(Y_{it} - Y_{it-1}) = \beta_0 + B_{i1}Hospital + B_{i2}Age + B_{i3}Sex + B_{i4}Education + B_{i5}Marital + B_{i6}Employment$$

Where:

$Y_{it}$  = score of subject  $i$  at time  $t$

$\beta_0$  = intercept

$\beta_{ij}$  = standardized regression coefficient of independent variable  $j$  for subject  $i$

### GEE Repeated Measures Logistic Regression Model

$$\ln\left(\frac{\pi_{it}}{1 - \pi_{it}}\right) = \beta_0 + B_{i1}Group + B_{i2}Time + B_{i3}(Group \times Time) + B_{i4}Hospital + B_{i5}Age + B_{i6}Sex$$

Where:

$\pi_{it}$  = conditional probability that subject  $i$  at time  $t$  has PTSD

$\beta_0$  = intercept

$\beta_{itj}$  = standardized regression coefficient of independent variable  $j$  for subject  $i$
